# Supplementary material for: One-pot oligosaccharide synthesis: reactivity tuning by post-synthetic modification of aglyconElectronic supplementary information (ESI) available: experimental data. See http://www.rsc.org/suppdata/cc/b4/b405886k/
Source: Royal Society of Chemistry journal article supplement (doi:10.1039/b405886k), 2004-01-01
Supplement: b405886k.doc [file b405886k.doc]

**# Supplementary Material (ESI) for Chemical Communications**

**# This journal is © The Royal Society of Chemistry 2004**

**Supplementary** **data**

**One-pot Oligosaccharide Synthesis: Reactivity Tuning by Post-synthetic** Modification of Aglycon

**Lijun Huang, Zhen Wang, Xuefei Huang***

Department of Chemistry, the Univeristy of Toledo, 2801 W. Bancroft Street, MS 602, Toledo, OH 43606, USA; *E-mail:* [*xuefei.huang@utoledo.edu*](mailto:xuefei.huang@utoledo.edu) *Tel: +1-419-530-1507.*

EXPERIMENTAL SECTION

General: 1H NMR (400 MHz or 600 MHz) and 13C NMR (100 MHz or 125 MHz) spectra were recorded in CDCl3 solutions at room temperature unless otherwise specified. Chemical shift (
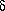
) values are given in ppm; coupling constants (J) are in Hz. Mass spectra were recorded on an ESQUIRE LC-MS using ESI technique to introduce the sample. High-solution mass spectra were recorded on a Micromass electrospray TOFTM II (Micromass, Wythenshawe, UK) mass spectrometer equipped with an orthogonal electrospray source (Z-spray ) 1positive pressure of anhydrous nitrogen with dry, fresh distilled solvents unless otherwise noted. Air- and moisture-sensitive liquids and solutions were transferred via syringe. Organic solutions were concentrated by rotary evaporation below 40oC at ca 25 Torr. Flash column chromatography was performed employing 230-400 mesh silica gels. Thin-layer using chromatography was performed using glass plates pre-coated to a depth of 0.25 mm with 230-400 mesh silica gel impregnated with a fluorescent indicator (254 nm). TLC plates were visualized with UV light and /or by staining with a yellow solution containing Ce(NH4)2(NO3)6 (0.5 g) and (NH4)6Mo7O244H2O (24.0 g) in 6% H2SO4 (500 mL).

For the preparation of compounds **1**, **6**, **6a** and **16,** see: S. Cao, F. Hernandez-Mateo, R. Roy, *J. Carbohydr. Chem.* 1998, **17**, 609.

**2a: *p*-Nitrophenyl-2,3,4-tri-O-benzoyl-1-thio--D-galactopyranoside**

A solution of compound **2** (867 mg , 1mmol) in 5 ml THF containing 0.1% acetic acid was treated with 1 M TBAF in THF (4 mL, 4 mmol) at rt for 4 hours, and then the solvent was removed under reduced pressure. The residue was extracted with EtOAc and washed with saturated aqueous NaHCO3, dried over Na2SO4. Purification by flash chromatography afforded compound **2a** in 90% yields (567 mg). 1H NMR (400 MHz, CDCl3)
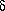
 2.62 (br,s, 1H, 6-OH), 3.67 (m, 1H, H6a), 3.89(m, 1H, H6b), 4.18 (t, 1H, *J* = 6.8Hz , H5), 5.15 (d, 1H, *J* = 9.6Hz, H1), 5.65 (dd, 1H, *J* = 3.2Hz, 8.4Hz, H3), 5.86 (t, 1H, *J* = 9.6Hz, H2), 5.89 (d, 1H, *J* = 2.3Hz, H4), 7.22-8.18 (m, 19H, Arom H); 13C NMR (100 MHz, CDCl3)
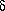
 60.9, 67.9, 69.1, 73, 78.6, 84.8 (C-1), 124, 128.6, 128.8, 129, 129.1, 129.9, 130, 130.1, 132.2, 133.7, 133.8, 134.4, 141.3, 147.4, 165.4, 165.6, 166.7; MS (ESI) *m*/*z* 651.9 [M + Na]+. HRMS [M + Na]+ calcd. for C33H27NNaO10S 652.1253, found 652.1260

**3: *p*-*N,N*-Diethylaminophenyl-2,3,4-tri-*O*-benzoyl-6-*O*-tert-butyldiphenylsilyl-1-thio-**-D-galacto-pyranoside**.

To a stirring solution of 20% H2SO4 (0.1 mL) and acetaldehyde (44 mg, 1 mmol) in 0.4 mL THF, were simultaneously added, over a period of 15 mins, a solution of **1** (84 mg 0.1 mmol) in 1 mL THF and solid NaBH4 (38 mg, 1 mmol) and the mixture was stirred at rt for 15 min, then neutralized with 10% aqueous NaOH (1 mL) and 1 ml sat. NaHCO3 to pH=7. The solution was extracted with 10 ml EtOAc, washed with water and brine, and dried over anhydrous Na2SO4. Purification by flash chromatography afforded product **3** (73 mg) in 82% yield. 1H NMR (400 MHz, CDCl3)
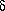
 1.0 (s, 9H, (CH3)3C), 1.18 (t, 6H, *J* = 3.2Hz, 2XCH3CH2), 3.38 (q, 4H, *J* = 3.2Hz, 2XCH3CH2), 3.75 (dd, 1H, *J* = 8.0Hz, 10.0Hz), 3.86 (dd, 1H, *J* = 5.6Hz, 7.6Hz), 4.10(t, 1H, *J* = 6.8Hz), 4.78 (d, 1H, *J* = 10.0 Hz, H1), 5.58 (dd, 1H, *J* = 3.2Hz, 10.0Hz), 5.68 (t, 1H, *J* = 9.6Hz), 6.04 (d, 1H, *J* = 2.8Hz), 6.58-8.01 (m, 24H, Arom H); 13C NMR (100 MHz, CDCl3)
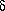
 12.8, 19.2, 26.9, 44.6, 61.6, 68.3, 68.6, 73.8, 86.8, 111.8, 127.8, 128, 128.4, 128.5, 128.6, 129.3, 129.7, 129.8, 129.9, 130, 130.1, 130.2, 132.9, 133.1, 133.2, 133.3, 133.4, 135.7, 135.8, 137.5, 165.4, 165.5, 165.8; MS (ESI) *m*/*z* 917.3 [M + Na]+. HRMS [M + Na]+ calcd. for C53H55NNaO8SSi 916.3315, found 916.3246.

**4: *p*-Methoxyphenyl-2,3,4-tri-*O*-benzoyl-6-*O*-tert-butyldiphenylsilyl-1-thio-**-D-galactopyranoside**.

The solution of **1** (400 mg, 0.48 mmol) in 2 mL THF was cooled down to 0oC followed by addition of 50% HBF4 (0.3 mL, 2.4 mmol). The solution was stirred for 10 minutes at 0oC, then NaNO2 (83 mg, 1.2 mmol) was added. The reaction was stirred further for 15 min at 0oC and diluted with dichloromethane and water. The organic phase was collected and dried over anhydrous Na2SO4. After evaporation of all solvents, the residue was dissolved in 30 mL methanol in a 250 mL thick-wall flask with a threaded neck, and *p*-toluenesulfonic acid (9 mg, 0.048 mmol) was added. The resulting solution was bubbled gently with a stream of O2 for 10 min, and then capped. The reaction mixture was stirred for 4 hrs at 65-70 oC, cooled down to rt, neutralized with solid NaHCO3 and all solvents were removed. The residue was re-dissolved in 50 mL EtOAc and washed with saturated NaHCO3 solution and brine, dried over Na2SO4. Purification by flash chromatography gave **4** in 80% yields (328 mg). 1H NMR (400 MHz, CDCl3)
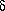
 0.99 (s, 9H, (CH3)3C), 3.73 (dd, 1H, *J* = 8.0Hz, 10.0Hz), 3.83 (s, 3H, OMe), 3.86 (dd, 1H, *J* = 6.0Hz, 10.4Hz), 4.09-4.13 (m, 1H), 4.82 (d, 1H, *J* = 9.6Hz, H1), 5.57-5.59 (m, 2H), 6.02 (d, 1H, *J* = 1.6Hz), 6.86-8.13 (m, 19H, Arom H); 13C NMR (100 MHz, CDCl3)
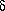
 19.3, 26.9, 55.5, 61.7, 68.2, 68.3, 73.8, 77.8, 85.4, 114.5, 120.6, 127.8, 128.0, 128.4, 128.6, 128.7, 129.3, 129.6, 129.8, 129.9, 130, 130, 130.1, 130.4, 132.9, 133.1, 133.4, 134, 135.8, 135.8, 137.6, 160.6, 165.3, 165.; MS (ESI) *m*/*z* 875.3 [M + Na]+, HRMS [M + Na]+ calcd. for C50H48O9SSiNa 875.2686, found 875.2666.

**5:** ***p*-Azidophenyl-2,3,4-tri-*O*-benzoyl-6-*O*-tert-butyldiphenylsilyl-1-thio-**-D-galactopyranoside**.

Compound **1** (84 mg, 0.1 mmol) was dissolved in a mixture solvent consisted of 5 mL of 8 N acetic acid and 5 mL THF at 0oC. A 5% aqueous solution of NaNO2 (0.26 mL) was added to this solution and the mixture was stirred for 10 mins. A 5% aqueous solution of NaN3 (0.65 ml) was then added and the reaction mixture was allowed to warm up to rt in 10 min. The reaction was again cooled to 0oC, neutralized with 10 % aqueous NaOH, extracted with EtOAc, washed with water and brine, and dried over anhydrous Na2SO4. After filtration, removal of all solvents under reduced pressure, compound **5** was obtained by flash chromatography in 85% yield (74 mg). 1H NMR (400 MHz, CDCl3)
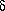
 1.0 (s, 9H, (CH3)3), 3.75 (dd, 1H, *J* = 7.6Hz, 10.0Hz), 3.86 (dd, 1H, *J* = 7.0Hz, 8.0Hz), 4.12 (m, 1H), 4.87 (d, 1H, *J* = 9.6 Hz, H1), 5.58 (m, 1H), 6.02 (s, 1H), 6.96-7.97 (m, 24H, Arom H); 13C NMR (100 MHz, CDCl3)
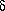
 19.3, 27, 55.5, 61.8, 68.2, 68.3, 73.6, 78.1, 85.3, 119.5, 126.5, 127.9, 128.1, 128.5, 128.7, 129.2, 129.6, 129.6, 130, 130, 130, 130, 130, 130.1, 132.9, 133.1, 133.3, 133.5, 135.7, 135.9, 136.8, 141, 165.3, 165.4, 165.8; MS (ESI) *m*/*z* 886.2 [M + Na]+, HRMS [M + Na]+ calcd. for C49H45N3O8SSiNa 886.2594, found 886.2607.

**5a: *p*-Azidophenyl-2,3,4-tri-*O*-benzoyl-1-thio-**-D-galactopyranoside**.

Compound **5a** was prepared as described in the synthesis of compound **2a**. 1H NMR (400 MHz, CDCl3)
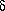
 3.59 (dd, 1H, *J* = 6.8Hz, 11.6Hz), 3.84 (dd, 1H, *J* = 6.8Hz, 12Hz), 4.09 (t, 1H, *J* = 4.8Hz), 4.94 (d, 1H, *J* = 9.6Hz, H1), 5.56 (dd, 1H *J* = 2.8Hz, 9.2Hz ), 5.72 (t, *J* = 10 Hz, 1H), 5.81 (d, 1H, *J* = 2.8Hz), 6.98-8.0 (m, 19H, Arom H); 13C NMR (100 MHz, CDCl3)
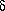
 60.9, 68.1, 69.2, 73.3, 78.1, 85.3, 119.6, 126.2, 128.5, 128.7, 128.8, 128.9, 129.4, 129.9, 130, 130.2, 133.6, 133.6, 134.1, 136.8, 131.2, 165.4, 165.6, 166.7; MS (ESI) *m*/*z* 648.3 [M + Na]+, HRMS [M + Na]+ calcd. for C33H27N3O8SNa 648.1417, found 648.1409.

**7: *p*-Bromophenyl-2,3,4-tri-*O*-benzoyl-6-*O*-tert-butyldiphenylsilyl-1-thio-**-D-galactopyranoside**.

To a solution of anhydrous copper (II) bromide (135 mg, 0.60mmol) and tbutyl nitrite (77 L, 0.75mmol) in anhydrous acetonitrile (5 mL) was added the solution of compound **1** (427 mg, 0.5 mmol) in 1 mL acetonitrile at rt. The resulting mixture was stirred for 45 min. The solution was diluted with 20 mL diethyl ether and washed with 1 N H2SO4; the collected organic phase was washed with saturated aqueous NaHCO3 and brine, and then dried over Na2SO4. Purification by flash chromatography gave the desired product **7** in 70% yield as a 3:1 mixture of monobromo : dibromo. (325 mg). 1H NMR (600 MHz, CDCl3)
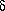
 0.99 (s, 9H, (CH3)3C), 3.74 (dd, 1H, *J* = 7.8Hz, 10.2Hz), 3.85 (1H, dd, *J* = 6.0Hz, 10.2Hz), 4.11 (t, 1H, *J* = 6.6Hz), 4.90 (d, 1H, 9.6Hz, H-1), 5.57-5.89 (m, 2H), 6.01 (d, 1H, *J* = 2.4Hz), 7.11-7.95 (m, 29H, Arom H); 13C NMR (100 MHz, CDCl3)
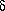
 19.3, 26.9, 61.7, 68.1, 68.2, 73.4, 78.1, 85.0, 123.4, 127.8, 128.0, 128.4, 128.6, 128.8, 129.1, 129.4, 129.5, 129.7, 129.9, 130, 130, 130.1, 132.7, 133, 133.3, 133.5, 133.6, 135.6, 135.8, 136.5, 165.3, 165.4, 165.7; MS (ESI) *m*/*z* 925.3 [M + Na]+.

**7a:  *p*-Bromophenyl-2,3,4-tri-*O*-benzoyl-1-thio-**-D-galactopyranoside**.

Compound **7a** was obtained as described in the preparation of compound **2a**. 1H NMR (400 MHz, CDCl3)
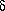
 2.79 (br, s, 1H, 6-OH), 3.62 (m,1H ), 3.83 (m, 1H ), 4.10 ( m, 1H ), 4.97 (d, 1H, *J* = 9.6 Hz, H1), 5.57 (dd, 1H, *J* = 3.2, 10 Hz), 5.71 (t, 1H, *J* = 9.6Hz), 5.83 (d, 1H, *J* = 2.8Hz), 7.21-7.98 (m, 19H, Arom H); 13C NMR (100 MHz, CDCl3)
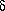
 29.9, 60.9, 68.1, 69.1, 73.3, 78.2, 85.1, 123.6, 128.6, 128.7, 128.9, 129.2, 129.9, 130, 130.2, 130.3, 132.2, 133.5, 133.6, 133.7, 133.9, 134.1, 134.3, 136.4, 165.4, 165.7, 166.7, ; MS (ESI) *m*/*z* 686.9 [M + Na]+, HRMS [M + Na]+ calcd. for C33H27BrO8SNa 685.0508, found 685.0488.

**8: *p*-Phthalimidophenyl-2,3,4-tri-*O*-benzoyl-6-*O*-tert-butyldiphenylsilyl-1-thio-**-D-galactopyranoside**

To a solution of compound **1** (175 mg, 0.21 mmol) and phthalic anhydride (37 mg, 0.25 mmol) in 4 ml toluene was added TEA (50.5 mg, 0.5mmol) at rt, and the resulting mixture was refluxed for 30 min. After removed the solvent under reduced pressure, the residue was extracted with EtOAc and water and the organic layer was dried over Na2SO4. Purification by flash chromatography gave the desired compound **8** in 90% yields (183 mg). 1H NMR (400 MHz, CDCl3)
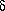
 1.0 (s, 9H, (CH3)3C), 3.80-3.90 (m, 2H), 3.86 (dd, 1H, *J* = 7.0Hz, 8.0Hz), 4.09-4.15 (m, 1H), 5.05 (d, 1H, *J* = 9.6Hz, H1), 5.65 (dd, 1H, *J* = 3.2Hz, 10.0Hz), 5.77 (t, 1H, *J* = 10.0Hz), 6.07 (d, 1H, *J* = 3.2Hz), 7.11-7.98 (m, 24H, Arom H); 13C NMR (100 MHz, CDCl3)
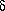
 19.3, 27, 61.9, 68.3, 68.7, 73.3, 78.2, 87.3, 124.1, 126.8, 127.9, 128.1, 128.4, 128.6, 128.8, 129.6, 129.6, 129.9, 129.9, 130.1, 130.1, 130.2, 131.9, 131.9, 132.8, 132.9, 133.0, 133.2, 133.3, 133.5, 133.5, 134.7, 135.7, 135.8, 165.4, 165.6, 165.7, 167.16; MS (ESI) *m*/*z* 990.4 [M + Na]+, HRMS [M + Na]+ calcd. for C57H49NO10SSiNa 990.2744, found 990.2755.

**10 *p*-Bromophenyl-2,3,4-tri-*O*-benzoyl-6-*O*-(2,3,4-tri-*O*-benzoyl-6-*O*-tert-butyldiphenylsilyl-**-D-galactopyranosyl)-1-thio-**-D-galactopyranoside**

Compound **10** was obtained by glycosylation of **4** with **7a** or conversion from **11**.

Method 1: acceptor **7a** (33 mg, 0.050 mmol), donor **4** (47 mg, 0.055mmol), acid-washed molecular sieves (MS-AW300, 500 mg) and CH2Cl2 (2 mL) were stirred for 30 min under N2. NIS (13.5 mg, 0.06 mmol) was added, and then the resulting solution was cooled down to -60oC followed by addition of 0.5 M TfOH in Et2O (30L, 0.015 mmol). The reaction was stirred for 60 min from -60oC to -40oC and quenched with 1 drop TEA at -40oC, diluted with 5 mL DCM and then was filtered. The solution was washed with saturated aqueous NaHCO3 and dried over Na2SO4. After filtration, the solution was concentrated and isolated by flash silica gel column to give the desired disaccharide **10** in 80% yield (55mg).

Method 2: compound **10** can also be converted from compound **11** according to the same procedure as described in the synthesis of compound **7** in 55% yields for the two steps. 1H NMR (400 MHz, CDCl3)
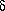
 0.93 (s, 9H, (CH3)3C), 3.60(d, 1H, *J* = 7.2Hz), 3.80 (dd, 1H, *J* = 7.2Hz, 10.4Hz), 3.96-4.01 (m, 1H), 4.15 (t, 1H, *J* = 3.2Hz), 4.73 (d, 1H, *J* = 9.6 Hz, H1’), 4.81(1H, d, *J* = 8.0 Hz, H1”), 5.43(dd, 1H, *J* = 2.8Hz, 10 Hz), 5.49-5.61 (m, 1H, 2H), 5.70 (dd, 1H, *J* = 5.6 Hz, 8.4 Hz ), 5.82 (d, 1H, *J* = 2.4Hz ), 6.03 (d, 1H, *J* = 2.4 Hz), 7.04-8.07 (m, 44H, Arom H); 13C NMR (100 MHz, CDCl3)
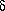
 19.1, 26.8, 60.6, 61, 67.8, 67.9, 68, 68.6, 70.2, 72.2, 73.2, 74, 84.8, 101.8, 101.5, 123.4, 127.8, 128, 128.4, 128.4, 128.6, 128.6, 128.7, 128.7, 128.8, 129.1, 129.2, 129.3, 129.5, 129.7, 129.8, 129.8, 129.8, 129.9, 130, 130, 130, 130.3, 132.1, 132.8, 133, 133.3, 133.3, 133.5, 133.6, 135.7, 135.8, 136.6; MS (ESI) *m*/*z* 1399.3 [M + Na]+, HRMS [M + Na]+ calcd. for C76H67BrO16SSiNa 1397.3000, found 1397.3014.

**11: *p*-Nitrophenyl-2,3,4-tri-*O*-benzoyl-6-*O*-(2,3,4-tri-*O*-benzoyl-6-*O*-tert-butyldiphenylsilyl-**-D-galactopyranosyl)-1-thio-**-D-galactopyranoside**

Compound **11** was obtained as described in the preparation of **10** (Method 1) in 78% yield. 1H NMR (600 MHz, CDCl3)
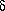
 0.93 (s, 9H, (CH3)3C), 3.61(d, 1H, *J* = 6.6Hz), 3.83 (dd, 1H, *J* = 7.2Hz, 14.4Hz), 3.98 (t, 1H, *J* = 7.2Hz), 4.08 (dd, 1H, *J* = 4.2Hz, 8.4Hz), 4.23 (dd, 1H, *J* = 4.8Hz, 4.8Hz), 4.80(1H, d, *J* = 8.4Hz, H1”), 4.92(d, 1H, *J* = 10.2Hz, H1’), 5.52 (dd, 1H, *J* = 3.0 Hz, 9.6Hz ), 5.57(dd, 1H, *J* = 3.0Hz, 10.2Hz ), 5.67(t, 1H, *J* = 10.2Hz), 5.69(dd, 1H, *J* = 6.4Hz, 8.8Hz), 5.88 (d, 1H, *J* = 3.0Hz), 6.01(d, 1H, *J* = 3.0Hz), 7.04-8.10 (m, 44H, Arom H); 13C NMR (100 MHz, CDCl3)
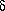
 19.1,26.8, 61, 67.8, 67.8, 68.6, 70.2, 72.2, 72.8, 74.0, 77.4, 77.4, 84.9, 101.4, 127.8, 128.0, 128.4, 128.5, 128.7, 128.7, 128.8, 128.9, 129.2, 129.2, 129.6, 129.7, 129.9, 129.9, 129.9, 130.0, 130.1, 130.2, 132.0, 132.8, 133, 133.3, 133.3, 133.4, 133.5, 133.7, 133.8, 135.7, 135.8, 165.2, 165.3, 165.4, 165.5, 165.6, 165.8; MS (ESI) *m*/*z* 1364.3 [M + Na]+, HRMS [M + Na]+ calcd. C76H67NO18SSiNa 1364.3746, found 1364.3733.

**10a:  *p*-Bromophenyl-2,3,4-tri-*O*-benzoyl-6-*O*-(2,3,4-tri-*O*-benzoyl-**-D-galactopyranosyl)-1-thio-**-D-galactopyranoside**

Compound **10a** was prepared as described in the synthesis of **2a** in 85% yield. 1H NMR (400 MHz, CDCl3)
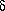
 2.6 (br, 1H, 6-OH), 3.44-3.48 (m, 1H), 3.63-3.66 (m, 1H), 3.87 -4.07 (m, 3H), 4.21 (t, 1H, *J* =5.6Hz), 4.79 (d, 1H, *J* = 9.6Hz, H1’), 4.83 (d, 1H, *J* = 8.0Hz, H1”), 5.47-5.62 (m, 3H), 5.76-5.82 (m, 2H), 5.95(d, 1H, *J* = 2.4Hz), 7.2-8.13 (m, 34H, Arom H); 13C NMR (100 MHz, CDCl3)
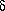
 60.9, 67.9, 68.3, 68.6, 69.1, 70.1, 72, 73.2, 74.4, 77.0, 77.4, 84.8, 101.7, 123.5, 128.1, 128.4, 128.5, 128.6, 128.9, 128.9, 129.1, 129.4, 129.5, 129.8, 129.9, 129.9, 130.0, 130.4, 130.5, 132.1, 133.4, 133.5, 133.6, 133.6, 133.8, 134, 134.6, 134.7, 135.0, 136.7, 165.3, 165.4, 165.5, 165.6, 165.7, 166.9; MS (ESI) *m*/*z* 1145.3 [M + Na]+, HRMS [M + Na]+ calcd. C60H49BrNaO16S 1159.1822, found 1159.1824.

**12: 1,2,3,4-Di-*O*-isopropylidene-6-*O*-(2,3,4-tri-*O*-benzoyl-6-*O*-tert-butyldiphenylsilyl-**-D-galacto-pyranosyl)-D-galactopyranoside**

Acceptor **9** (24 mg, 0.092 mmol), donor **2** (67 mg, 0.077mmol), acid-washed molecular sieves (MS-AW300, 500 mg) and CH2Cl2 (2 mL) were stirred for 30 min under N2. AgOTf (24 mg, 0.092 mmol) was added, and then the resulting solution was cooled down to -50oC followed by addition of *p*-TolSCl (12 mg, 0.077 mmol). The reaction was stirred for 30 min from -50oC to rt and quenched with 1 drop TEA. 5 mL DCM was added and all insoluble material was filtered off. The filtrate was washed with saturated aqueous NaHCO3 and dried over Na2SO4. Purification by flash chromatography gave the desired disaccharide **12** in 90% yield (67mg). 1H NMR (600 MHz, CDCl3)
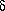
 1.0 (s, 9H, (CH3)3C), 1.17 (s, 6H, 2CH3), 1.18(s, 3H, CH3), 1.37(s, 3H, CH3), 3.78-3.85(m, 4H), 4.0 (dd, 1H, *J* = 5.4Hz , 10.2 Hz), 4.05-4.07 (m, 2H), 4.18 (dd, 1H, *J* = 2.4Hz, 5.4Hz), 4.35 (dd, 1H, *J* = 2.4Hz, 7.8Hz), 4.87 (d, 1H, *J* = 7.8Hz, H1”), 5.38 (d, 1H, *J* = 4.8Hz, H1’), 5.61(dd,1H, *J* = 3.6Hz, 10.8Hz), 5.70(dd, 1H, *J* = 8.4, 10.8Hz), 6.03(d, 1H, *J* = 3.6Hz, H-1’) , 7.07-8.01(m, 25H, Arom H); 13C NMR (100 MHz, CDCl3)
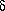
 19.2, 24.4, 25.1, 26, 26.1, 26.9, 61.5, 67.3, 68.2, 68.5, 70.2, 70.7, 70.7, 71.1, 72.3, 74, 96.4, 102, 108.6, 109.4, 127.8, 128, 128.4, 128.7, 129.3, 129.8, 129.8, 130.0, 130.1, 130.2, 132.8, 133.1, 133.1, 133.3, 133.4, 135.7, 135.8, 165.5, 165.6, 165.8; MS (ESI) *m*/*z* 995.5 [M + Na]+, HRMS [M + Na]+ calcd. C55H60O14SiNa 995.3650, found 995.3640.

**14: Methyl-2,3,4-tri-*O*-benzoyl-6-*O*-(2,3,4-tri-*O*-benzoyl-6-*O*-(2,3,4-tri-*O*-benzoyl-6-*O*-(2,3,4-tri-*O*-benzoyl-6-*O*-tert-butyldiphenylsilyl-**-D-galactopyranosyl)-**-D-galactopyranosyl)-**-D-galactopyranosyl)-**-D-glucopyranoside**

Acceptor **7a** (17 mg, 0.026 mmol), donor **2** (23 mg, 0.027mmol), acid-washed molecular sieves (MS-AW300, 200 mg) and CH2Cl2 (2 mL) were stirred for 30 min under N2. NIS (7.6 mg, 0.034 mmol) was added, and then the resulting solution was cooled down to -60oC followed by addition of 0.5 M TfOH in Et2O (16 L, 0.0081 mmol). The mixture was stirred for 60 min from -60oC to -40oC. After the mixture was cooled down to -60oC, MS-AW300 (100 mg) and second acceptor **2a** (15 mg, 0.024 mmol) were added, followed by NIS (7 mg, 0.031 mmol). The mixture was stirred for 1.5 hour from -60oC to -40oC. The third acceptor **13** (13.4 mg, 0.027 mmol) and AgOTf (8 mg, 0.031 mmol) were added at -50oC, followed by addition of *p*-TolSCl (4.5 mg, 0.029 mmol). The reaction mixture was kept for 3 hours from -30oC to rt, and then quenched with 1 drop TEA. 5 mL DCM was added and all insoluble material was filtered off. The filtrate was washed with saturated aqueous NaHCO3 and dried over Na2SO4. Purification by flash chromatography gave the desired tetrasaccharide **14** in 39% yield (22 mg). 1H NMR (400 MHz, CDCl3)
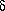
 0.908 (s, 9H, (CH3)3C), 3.08 (s, 3H, CH3O), 3.26-3.31 (m, 3H), 3.61-3.77 ( m, 4H), 3.92 (m, 2H), 3.99-4.11 (m, 3H), 4.39 (d, 1H, *J* = 7.6 Hz, H1”), 4.67 (d, 1H, *J* = 7.2Hz, H1”’), 4.75 (d, 1H, *J* = 8.0 Hz, H1””), 4.94 (d, 1H, *J* = 3.2Hz, H1’), 5.02 (dd, 1H, *J* = 10Hz, 3.2Hz), 5.35 (t, 1H, *J* = 10 Hz), 5.49-5..55 (m, 4H), 5.71 (m, 2H), 5.78 (d, 1H, *J* = 2.4Hz), 5.87 (d, 1H, *J* = 3.2Hz), 5.96 (d, 1H, *J* = 2.0Hz), 6.05 (t, 1H, *J* = 10 Hz), 6.99-8.08(m, 70H, Arom H); 13C NMR (100 MHz, CDCl3)
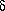
 19.0, 26.4, 54.8, 65.9, 66.5, 67.6, 67.7, 67.9, 68.3, 68.5, 69, 69.7, 70.1, 70.3, 70.4, 70.5, 71.8, 71.9, 72.1, 72.2, 72.5, 73, 73.5, 96.7, 100.8, 100.9, 102.1 ; MS (ESI) *m*/*z* 2190.3 [M + Na]+, HRMS [M + Na]+ calcd. C125H110O33SiNa 2189.8596, found 2189.6470.

**15: Methyl-2,3,4-tri-*O*-benzoyl-6-*O*-(2,3,4-tri-*O*-benzoyl-6-*O*-(2,3,4-tri-*O*-benzoyl-6-*O*-(2,3,4-tri-*O*-benzoyl-6-*O*-(2,3,4-tri-*O*-benzoyl-6-*O*-tert-butyldiphenylsilyl-**-D-galactopyranosyl)-**-D-galacto-pyranosyl)-**-D-galactopyranosyl)-**-D-galactopyranosyl)-**-D-glucopyranoside**

Acceptor **10a** (the ratio of monobromide to dibromide is 3 to 1) (23 mg, 0.020 mmol), donor **4** (19 mg, 0.022mmol), acid-washed molecular sieves (MS-AW300, 400 mg) and CH2Cl2 (2 mL) were stirred for 30 min under N2. NIS (6.0 mg, 0.027 mmol) was added, and then the resulting solution was cooled down to -60oC followed by addition of 0.5 M TfOH in Et2O (12 L, 0.006 mmol). The mixture was stirred for 2.5 hours from -60oC to -40oC. After the mixture was cooled down to -60oC, MS-AW300 (100 mg) and second acceptor **2a** (13 mg, 0.020 mmol) were added, followed by NIS (6 mg, 0.027 mmol). The mixture was stirred for 1.5 hour from -60oC to -40oC. The third acceptor **13** (15 mg, 0.03 mmol) and AgOTf (8.5 mg, 0.033 mmol) were added at -50oC, followed by addition of *p*-TolSCl (3.6 mg, 0.023 mmol). The reaction mixture was kept for 3 hours from -50oC to rt, and then was quenched with 1 drop TEA. 5 mL DCM was added and all insoluble material was filtered off. The filtrate was washed with saturated aqueous NaHCO3 and dried over Na2SO4. Purification by flash chromatography gave the desired pentasaccharide **15** in 33% yield (17mg). 1H NMR (600 MHz, CDCl3)
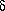
 0.891 (s, 9H, (CH3)3C)), 3.04-3.06 (m, 1H), 3.06 (s, 3H, CH3O), 3.12 (t, 1H, *J* = 5.4Hz), 3.19 (t, 1H, *J* = 9.6Hz), 3.27 (1H, dd, *J* = 5.4, 9.6Hz), 3.46 (1H, t, *J* = 9.0Hz), 3.58 (1H, dd, *J* = 6.6Hz, 11.4Hz), 3.65 (1H, t, *J* = 8.4Hz), 3.69-3.75 (m, 3H), 3.91-4.09 (m, 5H), 4.30 (d, 1H, *J* = 7.8Hz, H1”), 4.31 (d, 1H, *J* = 7.8 Hz, H1”’), 4.68 (d, 1H, *J* = 7.8Hz, H1”’’), 4.73 (d, 1H, *J* = 7.8Hz, H1””’), 4.92 (d, 1H, *J* = 3.6Hz, H1’), 4.99 (dd, 1H, *J* = 3.6Hz, 10.8Hz), 5.28-5.35 (m, 2H), 5.41-5.59 (m, 6H), 6.69 (dd, 1H, *J* = 8.4Hz, 10.2Hz), 5.72 (d, 1H, *J* = 3.0Hz), 5.83 (d, 1H, *J* = 3.0Hz), 5.85 (d, 1H, *J* = 3.0Hz), 5.94 (s, 1H), 6.05 (t, 1H, *J* = 9.6Hz), 6.88-8.08(m, 85 H, Arom H); 13C NMR (125 MHz, CDCl3)
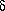
 18.9, 26.7, 55.3, 59.7, 65.1, 65.9, 66.5, 67.4, 67.4, 67.8, 68.3, 68.4, 68.9, 69.6, 70.0, 70.1, 70.2, 70.3, 70.4, 71.7, 71.8, 72.1, 72.1,72.2, 73, 73.3, 96.6, 100.5, 100.7, 100.8, 102.1; MS (ESI) *m*/*z* 2665.0 [M + Na]+, HRMS [M + Na]+calcd. C152H132NaO41Si 2663.7911, found 2663.7876.

**17: *p*-Nitrophenyl-2-phthalimido-3,6-di-*O*-benzyl-2-deoxy-1-thio-**-D-glucopyranoside**

To a 250 mL round-bottom flask was added the triacetate **16** (5.72g, 10 mmol) and a 2:3 mixture of MeOH-CH2Cl2 (80mL). The mixture was cooled to -20oC, treated with a 0.3 M NaOMe solution in MeOH (13.3mL, 4 mmol) and stirred for 10 min, then warmed to -10oC and stirred for 2 h. The reaction was warmed to 0oC and neutralized with acetic acid to pH=7. The suspension was concentrated under reduced pressure, diluted with CH2Cl2, filtered and afforded the white solid triol (4.3 g). The crude triol was dried under vacuum in a 250 ml round-bottom flask, and then suspended in anhydrous toluene (70 mL). Benzaldehyde dimethylacetal (1.6 mL, 10.6mmol) and camphorsulfonic acid (447 mg, 1.93mmol) were also added and the mixture was stirred at 90oC for 3h in a flask equipped with a Dean-Stark apparatus. The temperature was increased to 120oC and refluxed until 1mL of MeOH-toluene azeotrope had been collected, and then cooled to rt. The mixture was quenched with saturated NaHCO3 and diluted with EtOAc. The aqueous layer was separated; the combined organic phase was dried over Na2SO4 and concentrated by rotary evaporation. The crude benzyl acetal (4.7 g) was dried in high vacuum overnight and suspended in anhydrous DMF (50 mL) with activated MS (4 g). The suspension was stirred for 30 min at rt, then cooled to 0oC in ice-bath followed by addition of 60% NaH (700 mg, 17.6 mmol). The resulting suspension was stirred for 30 min at 0oC then treated with BnBr (1.26 mL, 10.5 mmol). The mixture was warmed to rt and stirred for 1.5h. Then the mixture was cooled back to 0oC and quenched with acetic acid to pH=7, filtered, diluted with EtOAc. The organic phase was collected and washed with saturated NaHCO3, dried over Na2SO4. To the crude benzyl ether (5.0g), NaCNBH3 (3.5 g, 56 mmol), MS-AW300 (6 g), and dry THF (80 mL) was added dropwise a cold saturated solution of 2M HCl in Et2O ( about 30 mL) until no more gas was formed. The reaction was stopped after 2 hours by addition of solid NaHCO3 (4 g). The mixture was diluted with CH2Cl2 (200 mL) and filtered through Celite. The organic phase was collected and washed with saturated NaHCO3 and brine, and dried over Na2SO4. The residue was purified by flash chromatography to give the compound **17** in 57% yields (3.6 g). 1H NMR (400 MHz, CDCl3)
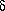
 2.88 (d, 1H, *J* = 2.4Hz, 6-OH), 3.79-3.87 (m, 4H), 4.29-4.32 (m, 2H), 4.52-4.74 (m, 4H, 2 X PhCH2O), 5.70 (d, 1H, *J* = 10 Hz, H1), 6.94-7.99 (m, 18 H, Arom H); 13C NMR (100 MHz, CDCl3)
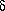
 54.3, 70.5, 73.7, 74.0, 74.9, 78.5, 79.9, 82.4, 123.7, 123.9, 124.1, 127.9, 128, 128.1, 128.3, 128.5, 128.8, 130.3, 131.6, 134.3, 137.8, 138, 142.8, 146.8, 167.4, 168.1; MS (ESI) m/z 649.1 [M + Na]+, HRMS [M + Na]+ calcd. C34H30N2NaO8S 649.1621, found 649.1595.

**18: Benzyl-2-phthalimido-3,6-di-*O*-benzyl-2-deoxy-**-D-glucopyranoside**

Compound **18** was prepared as described in the synthesis of compound **12**. 1H NMR (600 MHz, CDCl3)
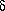
 2.87 (d, 1H, *J* = 1.8 Hz, 6-OH), 3.60-3.68 (m, 1H), 4.19-4.21 (m, 2H), 4.46 (td, 2H, *J* = 12Hz, PhCH2O), 4.30 (d, *J* = 12Hz, PhCHaO), 4.91 (d, *J* = 12Hz, PhCHbO), 4.43 (d, *J* = 12Hz, PhCHaO), 5.03 (d, *J* = 12Hz, PhCHbO), 5.13 (d, 1H, *J* = 7.8Hz, H1), 6.91-7.82 (m, 19 H, Arom H); 13C NMR (100 MHz, CDCl3)
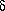
 55.7, 70.9, 71.1, 73.8, 74.1, 74.5, 74.6, 78.8, 97.7, 123.4, 127.6, 127.7, 127.8, 128.0, 128.0, 128.1, 128.3, 128.3, 128.7, 131.9, 133.8, 137.4, 137.8, 138.4,167.5, 168.1; MS (ESI) m/z 602.3 [M + Na]+, HRMS [M + Na]+ calcd. C35H33NNaO7 602.2155, found 602.2145.

**19: *p*-Aminophenyl-2-phthalimido-3,6-di-*O*-benzyl-2-deoxy-1-thio-**-D-glucopyranoside**

The mixture of **18** (300 mg, 0.48 mmol) and SnCl2.H2O (433 mg, 1.92 mmol) in EtOH (7 mL) was refluxed for 4 hours, and then cooled down to rt. EtOH was removed under vacuum followed by addition of EtOAc (50 ml). The resulting mixture was filtered through Celite, extracted with saturated aqueous NaHCO3 (20 ml) and the organic phase was collected. Purification by flash chromatography gave **19** in 80% yields (230 mg). 1H NMR (600 MHz, CDCl3)
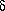
 2.88 (bs, 1H, 6-OH), 3.59-3.63 (m, 1H), 3.74-3.77 (m, 2H), 3.82 (dd, 1H, *J* = 4.8, 10.2Hz), 4.13-4.21 (m, 2H), 4.49 (d, 1H, *J* = 12Hz, PhCHaO), 4.26 (d, *J* = 12Hz, PhCHa’O), 4.87 (d, *J* = 12Hz, PhCHb’O), 4.71 (d, *J* = 12Hz, PhCHbO), 5.33 (d, 1H, *J* = 10.2Hz, H1), 6.46-7.82 (m, 18 H, Arom H); 13C NMR (100 MHz, CDCl3)
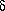
 54.7, 71, 74.4, 74.7, 77.9, 79.9, 84.4, 115.4, 118.6, 123.5, 123.7, 127.7, 128.0, 128.0, 128.1, 128.3, 128.7, 131.9, 131.9, 134, 134.1, 136.4, 137.9, 138.3, 147.3, 167.6, 168.4; MS (ESI) m/z 602.3 [M + Na]+, HRMS [M + Na]+ calcd. C34H32N2NaO6S 619.1879, found 619.1852.

**20: *p*-Bromophenyl-2-phthalimido-3,6-di-*O*-benzyl-2-deoxy-1-thio-**-D-glucopyranoside**

Compound **20** (the ratio of monobromide to dibromide is 3 to 1) was prepared as described in the synthesis of compound **7**. 1H NMR (400 MHz, CDCl3)
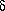
 2.83 (d, 1H, *J* = 2.8Hz, 6-OH), 3.67-3.72 (m, 1H), 3.77-3.85 (m, 3H), 4.19-4.24 (m, 2H), 5.20 (d, 1H, *J* = 12Hz, PhCHaO), 4.29 (d, *J* = 12Hz, PhCHa’O), 4.91 (d, *J* = 12Hz, PhCHb’O), 4.71 (d, *J* = 12Hz, PhCHbO), 5.51 (d, 1H, *J* = 9.2Hz, H1), 6.93-7.82 (m, 18 H, Arom H); 13C NMR (100 MHz, CDCl3)
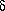
 54.6, 70.8, 74, 74.1, 74.8, 78.1, 79.9, 83.5, 122.6, 123.6, 123.8, 127.8, 128, 128.1, 128.2, 128.4, 128.8, 131.3, 132.1, 134.3, 134.5, 137.9, 138.2, 167.5, 168.3; MS (ESI) m/z 705.3 [M + Na]+, HRMS [M + Na]+ calcd. C34H30BrNNaO6S 682.0875, found 682.0900.

**21: *p*-Methoxyphenyl-2-phthalimido-3,6-di-*O*-benzyl-2-deoxy-1-thio-**-D-glucopyranoside**

Compound **21** was prepared as described in the synthesis of compound **4.** 1H NMR (400 MHz, CDCl3)
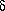
 3.02 (d, 1H, *J* = 2.8Hz, 6-OH), 3.6 (dd, 1H, *J* = 4.8Hz, 9.6Hz), 3.73 (s, 3H, OMe), 3.77-3.81 (m, 2H), 3.84 (dd, 1H, *J* = 4.8Hz, 9.6Hz), 4.17-4.21 (m, 2H), 4.53 (d, 1H, *J* = 12Hz, PhCHaO), 4.28 (d, *J* = 12Hz, PhCHa’O), 4.89 (d, *J* = 12Hz, PhCHb’O), 4.72 (d, *J* = 12Hz, PhCHbO), 5.42 (d, 1H, *J* = 9.6Hz, H1), 6.71-7.84 (m, 18 H, Arom H); 13C NMR (100 MHz, CDCl3)
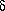
 54.8, 55.5, 70.9, 74, 74.2, 74.8, 78.1, 80, 84.1, 114.6, 122, 123.5, 123.8, 127.7, 128.0, 128.0, 128.2, 128.4, 128.7, 131.8, 131.9, 134, 134.2, 136.1, 138.0, 138.2, 167.6, 168.4; MS (ESI) m/z 634.1 [M + Na]+.

**22: *p*-Methoxyphenyl-2-phthalimido-3,6-di-*O*-benzyl-4-O-tert-butyldimethylsilyl-2-deoxy-1-thio-**-D-glucopyranoside**

The solution of compound **21** (306 mg, 0.5 mmol) and MS-AW300 (500 mg) in CH2Cl2 (5 ml) was stirred under N2 for 30 min, and the cooled down to -20oC, followed by addition of TBSOTf (230 L, 1 mmol) and 2,6-lutidine (233 L, 2mmol). The mixture was stirred for 2 hours from -20oC to rt and diluted with EtOAc (50 mL). After filtration, the filtrate was washed subsequently with 1 N H2SO4, saturated aqueous NaHCO3 and brine, and dried over Na2SO4. Purification by flash chromatography gave compound **22** in 96% yields (348 mg). 1H NMR (400 MHz, CDCl3)
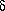
 0.058 (s, 6H, 2CH3Si), 0.88 (s, 9H, (CH3)3C-), 3.64-3.71 (m, 3H), 3.70 (s, 3H, OMe), 3.80-3.83 (m, 1H), 4.17-4.20 (m, 2H), 4.28 (d, 1H, *J* = 12Hz, PhCHaO), 4.27 (d, *J* = 12Hz, PhCHa’O), 4.88 (d, *J* = 12Hz, PhCHb’O), 4.74 (d, *J* = 12Hz, PhCHbO), 5.42 (d, 1H, *J* = 9.6Hz, H1), 6.64-7.74 (m, 18 H, Arom H); 13C NMR (100 MHz, CDCl3)
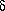
 18.2, 16.1, 55.3, 55.4, 69.5, 72.7, 73.5, 75.8, 80.8, 82.2, 83.8, 114.5, 122.3, 123.4, 13.6, 127.3, 127.6, 127.7, 127.8, 128.1, 128.5, 133.9, 134.0, 135.6, 138.3, 138.7, 167.3, 168.2; MS (ESI) m/z 748.3 [M + Na]+,HRMS [M + Na]+ calcd. C41H47NNaO7SSi 748.2740, found 748.2720.

**23: Benzyl 2-phthalimido-3,6-di-*O*-benzyl-4-*O*-(2-phthalimido-3,6-di-*O*-benzyl-4-*O*-(2-phthalimido-3,6-di-*O*-benzyl-4-*O*-(2-phthalimido-3,6-di-*O*-benzyl-4-*O*-tert-butyldimethylsilyl-2-deoxy-**-D-gluco-pyranosyl)-2-deoxy-**-D-glucopyranosyl)-2-deoxy-**-D-glucopyranosyl)-2-deoxy-**-D-glucopyranoside**.

Acceptor **20** (20 mg, 0.029 mmol), donor **22** (23 mg, 0.032mmol), acid-washed molecular sieves (MS-AW300, 500 mg), TSP (7.1 mg, 0.032 mmol) and CH2Cl2 (2 mL) were stirred for 60 min under N2. The resulting solution was cooled down to -65oC followed by addition of Tf2O (4.9 L, 0.029 mmol). The mixture was stirred for 2.5 hours from -60oC to -30oC. After the mixture was cooled down to -60oC, MS-AW300 (100 mg) and second acceptor **17** (16 mg, 0.026 mmol) were added, followed by NIS (7.8 mg, 0.034 mmol). The mixture was stirred for 1.5 hour from -30oC to 0oC. After the reaction was cooled down to -60oC, the third acceptor **18** (17 mg, 0.029mmol) and AgOTf (9.0 mg, 0.035 mmol) were added, followed by addition of *p*-TolSCl (4.5 mg, 0.029 mmol). The reaction mixture was kept for 3 hours from -30oC to rt, and then was quenched with 1 drop TEA. 5 mL DCM was added to the reaction mixture and all insoluble material was filtered off. The filtrate was washed with saturated aqueous NaHCO3 and dried over Na2SO4. Purification by flash chromatography gave the desired tetrasaccharide **23** in 25% yield (15mg). 1H NMR (600 MHz, CDCl3)
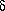
 0.04 (s, 6H, (CH3)2Si), 0.82 s, 9H, (CH3)3C), 2.76 (d, 1H, *J* = 10.2Hz), 2.84 (d, 1H, *J* = 10.2Hz), 2.98 (dd, 1H, *J* = 4.2Hz, 12.6Hz), 3.08 (dd, 1H, *J* = 4.8Hz, 12.6Hz), 3.17-3.44 (m,8H), 3.61 (d, 1H, *J* = 9.0Hz), 3.75 (dd, 1H, *J* = 7.8Hz, 9.0Hz), 3.98-4.48 (m, 22 H), 4.57-4.66 (m, 3H), 4.75-4.77 (m, 2H), 4.84 (d, 1H, J=8.4Hz, H1), 4.85 (d, 1H, *J* = 12.6Hz, PhCHaO), 5.00 (1H, *J* = 7.8Hz, H1’’), 5.03 (d, 1H, *J* = 8.4Hz, H1”’), 5.22 (1H, d, *J* = 7.8Hz, H1””), 6.22-7.29 (m, 45H, Aromatic H), 7.61-7.84 (m, 14H, Aromatic H); 13C NMR (125 MHz, CDCl3)
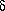
 18.2, 26.2, 29.9, 55.9, 56.8, 56.8, 57, 67.3, 67.5, 68.3, 68.3, 70.6, 72.4, 72.5, 72.6, 72.8, 73.3, 73.8, 74.3, 74.6, 74.7, 74.8, 74.8, 75.5, 75.6, 75.7, 76.6, 76.7, 77.3, 77.4, 77.6, 81.4, 96.8, 96.8, 97, 97.3; MS (ESI) m/z 2131.3 [M + Na]+, HRMS [M + Na]+ calcd. C41H47NNaO7SSi 2129.8065, found 2129.7935.
